# Supplementary material for: Effect of Inter-Observer Variation on the Association between Contamination Hazards and the Microbiological Quality of Water Sources: A Longitudinal Study
Source: MDPI journal article supplement (doi:10.3390/ijerph17249192), 2020-12-09
Supplement: s1 [file s1]

Okotto-Okotto et al: Effect of inter-observer variation on association between contamination hazards and microbiological quality of water sources: a longitudinal study

**Table S1.** electro-conductivity and turbidity of water samples from different sources.

| Source type.         | Mean turbidity – NTU (n*) | Mean electro-conductivity - $\mu$ S (n*) |
|----------------------|---------------------------|------------------------------------------|
| Piped or kiosk water | 11.9 (37)                 | 180.4 (38)                               |
| Borehole             | 12.0 (6)                  | 1276.8 (6)                               |
| Well /spring         | 65.0 (27)                 | 668.7 (28)                               |
| Rainwater            | 3.9 (52)                  | 72.8 (53)                                |
| Surface water        | 352.0 (44)                | 384.8 (44)                               |

\*n= number of samples.
