# Supplementary material for: Effect of Inter-Observer Variation on the Association between Contamination Hazards and the Microbiological Quality of Water Sources: A Longitudinal Study
Source: MDPI journal article supplement (doi:10.3390/ijerph17249192), 2020-12-09
Supplement: s1 [file s1]

Okotto-Okotto et al: Effect of inter-observer variation on association between contamination hazards and microbiological quality of water sources: a longitudinal study

| Risk factor                         | Univariate odds ratio (confidence intervals) | P value | Odds ratio adjusted for source type (confidence intervals) | P value |
|-------------------------------------|----------------------------------------------|---------|------------------------------------------------------------|---------|
| Sanitary risk score Overall (%)     | 1.03 (1.01-1.06)                             | 0.019   | 0.99 (0.96-1.03)                                           | 0.690   |
| Human faecal hazard (%)             | 1.01 (1.00-1.02)                             | 0.051   | 0.99 (0.97-1.01) <sup>a</sup>                              | 0.319   |
| Animal faecal hazard (%)            | 1.00 (0.99-1.01)                             | 0.829   | 1.00 (0.99-1.02)                                           | 0.523   |
| Non-faecal hazard (%)               | 1.03 (1.01-1.05)                             | 0.005   | 1.01 (0.99-1.03)                                           | 0.568   |
| Protection measures compromised (%) | 1.03 (1.02-1.05)                             | <0.001  | 0.99 (0.96 to 1.01) <sup>b</sup>                           | 0.320   |

**Table S3:** Odds ratios for hazards recorded by Surveyor A versus high contamination (>150cfu/100ml) of source water with *E. coli* based on logistic regression of 119 samples from 89 water points (<sup>a</sup> excludes rainwater systems; <sup>b</sup> excludes surface water points)

| Risk factor                         | Univariate odds ratio (confidence intervals) | P value | Odds ratio adjusted for source type and rainfall (confidence intervals) | P value |
|-------------------------------------|----------------------------------------------|---------|-------------------------------------------------------------------------|---------|
| Sanitary risk score Overall %       | 1.02 (1.00 to 1.06)                          | 0.039   | 1.00 (0.97 to 1.04)                                                     | 0.839   |
| Human faecal hazards (%)            | 1.02 (1.01 to 1.03)                          | <0.001  | 1.00 (0.98 to 1.02) <sup>a</sup>                                        | 0.856   |
| Animal faecal hazard (%)            | 0.99 (0.98 to 1.01)                          | 0.470   | 1.00 (0.99 to 1.02)                                                     | 0.797   |
| Non-faecal hazard (%)               | 1.02 (1.01 to 1.04)                          | 0.007   | 1.01 (0.99 to 1.03)                                                     | 0.244   |
| Protection measures compromised (%) | 1.02 (1.01 to 1.04)                          | 0.002   | 0.99 (0.97 to 1.02) <sup>b</sup>                                        | 0.675   |

**Table S4:** Odds ratios for hazards recorded by Surveyor A versus high contamination (>150cfu/100ml) of source water with intestinal enterococci, based on logistic regression of 119 samples from 89 water points (<sup>a</sup> excludes rainwater systems; <sup>b</sup> excludes surface water points)

| Risk factor                         | Univariate odds ratio (confidence intervals) | P value | Odds ratio adjusted for source type (confidence intervals) | P value |
|-------------------------------------|----------------------------------------------|---------|------------------------------------------------------------|---------|
| Sanitary risk score Overall (%)     | 1.06 (1.03-1.08)                             | <0.001  | 1.01 (0.98-1.04)                                           | 0.431   |
| Human faecal hazard (%)             | 1.01 (0.99-1.02)                             | 0.290   | 0.99 (0.98-1.00) <sup>a</sup>                              | 0.188   |
| Animal faecal hazard (%)            | 1.01 (0.99-1.02)                             | 0.393   | 1.02 (1.00-1.04)                                           | 0.031   |
| Non-faecal hazard (%)               | 1.04 (1.02-1.06)                             | <0.001  | 1.02 (1.00-1.04)                                           | 0.068   |
| Protection measures compromised (%) | 1.03 (1.02-1.05)                             | <0.001  | 1.00 (0.97 to 1.03) <sup>b</sup>                           | 0.951   |

**Table S5:** Odds ratios for hazards recorded by Surveyor C versus high contamination (>150cfu/100ml) of source water with *E. coli* based on logistic regression of 121 samples from 89 water points (<sup>a</sup> excludes rainwater systems; <sup>b</sup> excludes surface water points)

| Risk factor                            | Univariate odds ratio<br>(confidence intervals) | P value | Odds ratio adjusted for<br>source type and rainfall<br>(confidence intervals) | P value |
|----------------------------------------|-------------------------------------------------|---------|-------------------------------------------------------------------------------|---------|
| Sanitary risk score<br>Overall %       | 1.04 (1.01 to 1.07)                             | 0.003   | 1.01 (0.98 to 1.04)                                                           | 0.424   |
| Human faecal hazards<br>(%)            | 1.01 (1.01 to 1.02)                             | 0.001   | 1.00 (0.98 to 1.01) <sup>a</sup>                                              | 0.760   |
| Animal faecal hazard<br>(%)            | 1.00 (0.99 to 1.02)                             | 0.718   | 1.01 (1.00 to 1.03)                                                           | 0.186   |
| Non-faecal hazard (%)                  | 1.03 (1.01 to 1.05)                             | 0.011   | 1.01 (0.99 to 1.03)                                                           | 0.325   |
| Protection measures<br>compromised (%) | 1.02 (1.01 to 1.03)                             | 0.001   | 1.00 (0.97 to 1.02) <sup>b</sup>                                              | 0.710   |

**Table S6:** Odds ratios for hazards recorded by Surveyor C versus high contamination (>150cfu/100ml) of source water with intestinal enterococci, based on logistic regression of 121 samples from 89 water points (<sup>a</sup> excludes rainwater systems; <sup>b</sup> excludes surface water points)

| Risk factor                            | Univariate odds<br>ratio (confidence<br>intervals) | P value | Odds ratio adjusted for<br>source type (confidence<br>intervals) | P value |
|----------------------------------------|----------------------------------------------------|---------|------------------------------------------------------------------|---------|
| Sanitary risk score<br>Overall (%)     | 1.05 (1.02-1.08)                                   | 0.002   | 1.00 (0.97-1.04)                                                 | 0.922   |
| Human faecal hazard (%)                | 1.00 (0.99-1.01)                                   | 0.490   | 0.99 (0.98-1.01) <sup>a</sup>                                    | 0.916   |
| Animal faecal hazard (%)               | 1.00 (0.99-1.02)                                   | 0.609   | 1.00 (0.99-1.02)                                                 | 0.640   |
| Non-faecal hazard (%)                  | 1.02 (1.01-1.04)                                   | 0.004   | 1.01 (1.00-1.03)                                                 | 0.058   |
| Protection measures<br>compromised (%) | 1.03 (1.02-1.04)                                   | <0.001  | 0.99 (0.97 to 1.02) <sup>b</sup>                                 | 0.672   |

**Table S7:** Odds ratios for hazards recorded by Surveyor E versus high contamination (>150cfu/100ml) of source water with *E. coli* based on logistic regression of 116 samples from 87 water points (<sup>a</sup> excludes rainwater systems; <sup>b</sup> excludes surface water points)

| Risk factor                      | Univariate odds ratio<br>(confidence intervals) | P value | Odds ratio adjusted for<br>source type and rainfall<br>(confidence intervals) | P value |
|----------------------------------|-------------------------------------------------|---------|-------------------------------------------------------------------------------|---------|
| Sanitary risk score<br>Overall % | 1.04 (1.01 to 1.07)                             | 0.009   | 1.02 (0.98 to 1.05)                                                           | 0.359   |
| Human faecal hazards<br>(%)      | 1.01 (1.00 to 1.02)                             | 0.020   | 1.00 (0.99 to 1.02) <sup>a</sup>                                              | 0.801   |
| Animal faecal hazard<br>(%)      | 1.00 (0.99 to 1.01)                             | 0.988   | 1.01 (0.99 to 1.02)                                                           | 0.369   |
| Non-faecal hazard (%)            | 1.01 (1.00 to 1.03)                             | 0.103   | 1.01 (0.99 to 1.03)                                                           | 0.262   |

|                                     |                     |       |                                  |       |
|-------------------------------------|---------------------|-------|----------------------------------|-------|
| Protection measures compromised (%) | 1.02 (1.01 to 1.03) | 0.001 | 0.99 (0.96 to 1.02) <sup>b</sup> | 0.477 |
|-------------------------------------|---------------------|-------|----------------------------------|-------|

**Table S8:** Odds ratios for hazards recorded by Surveyor E versus high contamination (>150cfu/100ml) of source water with intestinal enterococci, based on logistic regression of 116 samples from 87 water points (<sup>a</sup> excludes rainwater systems; <sup>b</sup> excludes surface water points)

| Risk factor                         | Univariate odds ratio (confidence intervals) | P value | Odds ratio adjusted for source type (confidence intervals) | P value |
|-------------------------------------|----------------------------------------------|---------|------------------------------------------------------------|---------|
| Sanitary risk score Overall (%)     | 1.05 (1.02-1.07)                             | <0.001  | 0.97 (0.93-1.01)                                           | 0.115   |
| Human faecal hazard (%)             | 1.00 (0.99-1.01)                             | 0.592   | 0.98 (0.96-1.00) <sup>a</sup>                              | 0.097   |
| Animal faecal hazard (%)            | 1.01 (1.00-1.02)                             | 0.106   | 1.00 (0.98-1.03)                                           | 0.731   |
| Non-faecal hazard (%)               | 1.04 (1.02-1.05)                             | <0.001  | 1.01 (0.99-1.03)                                           | 0.319   |
| Protection measures compromised (%) | 1.03 (1.02-1.04)                             | <0.001  | 0.98 (0.95 to 1.02) <sup>b</sup>                           | 0.433   |

**Table S9:** Odds ratios for hazards recorded by Surveyor F versus high contamination (>150cfu/100ml) of source water with *E. coli* based on logistic regression of 131 samples from 93 water points (<sup>a</sup> excludes rainwater systems; <sup>b</sup> excludes surface water points)

| Risk factor                         | Univariate odds ratio (confidence intervals) | P value | Odds ratio adjusted for source type and rainfall (confidence intervals) | P value |
|-------------------------------------|----------------------------------------------|---------|-------------------------------------------------------------------------|---------|
| Sanitary risk score Overall %       | 1.04 (1.01 to 1.06)                          | 0.002   | 0.99 (0.95 to 1.03)                                                     | 0.574   |
| Human faecal hazards (%)            | 1.01 (1.00 to 1.02)                          | 0.086   | 0.99 (0.97 to 1.01) <sup>a</sup>                                        | 0.169   |
| Animal faecal hazard (%)            | 1.00 (0.99 to 1.02)                          | 0.522   | 1.01 (0.98 to 1.03)                                                     | 0.658   |
| Non-faecal hazard (%)               | 1.03 (1.01 to 1.04)                          | 0.001   | 1.01 (0.99 to 1.03)                                                     | 0.531   |
| Protection measures compromised (%) | 1.02 (1.01 to 1.04)                          | <0.001  | 0.99 (0.95 to 1.04) <sup>b</sup>                                        | 0.751   |

**Table S10:** Odds ratios for hazards recorded by Surveyor F versus high contamination (>150cfu/100ml) of source water with intestinal enterococci, based on logistic regression of 131 samples from 93 water points (<sup>a</sup> excludes rainwater systems; <sup>b</sup> excludes surface water points)
