# Supplementary material for: Effect of Inter-Observer Variation on the Association between Contamination Hazards and the Microbiological Quality of Water Sources: A Longitudinal Study
Source: MDPI journal article supplement (doi:10.3390/ijerph17249192), 2020-12-09
Supplement: s1 [file s1]

Okotto-Okotto et al: Effect of inter-observer variation on association between contamination hazards and microbiological quality of water sources: a longitudinal study

| Hazard observation                                                                         | Hazard type                |
|--------------------------------------------------------------------------------------------|----------------------------|
| <b>Rainwater systems</b>                                                                   |                            |
| Are there bird droppings on the roof catchment area?                                       | Animal faecal hazard       |
| Are there leaves / plants on the roof catchment area?                                      | Other contamination hazard |
| Are there branches overhanging the roof catchment area?                                    | Animal faecal hazard       |
| Are there other contamination sources around the roof catchment area?                      | Other contamination hazard |
| Are the guttering channels that collect water dirty or filled with debris such as leaves?  | Other contamination hazard |
| Is there a moveable inlet pipe from the gutter to the tank?                                | Protection compromised     |
| Is there a filter box or a sieve at the tank inlet?                                        | Protection compromised     |
| Is there debris in the filter box?                                                         | Protection compromised     |
| Is there any other point of entry to the tank that is not properly covered?                | Protection compromised     |
| Is there any defect in the walls or top of the tank (e.g. cracks) that could let water in? | Protection compromised     |
| Is there a depression on top of the tank that would allow ponding?                         | Protection compromised     |
| Is there a concrete floor under the tap or place where water is collected?                 | Protection compromised     |
| Is the concrete floor cracked?                                                             | Protection compromised     |
| Is the concrete floor dirty?                                                               | Other contamination hazard |
| Is the concrete floor broken?                                                              | Protection compromised     |
| Is the bucket used to collect water left on the ground                                     | Protection compromised     |
| Does the bucket used to collect water look dirty?                                          | Other contamination hazard |

|                                                                                                                          |                            |
|--------------------------------------------------------------------------------------------------------------------------|----------------------------|
| Is the water collection area inadequately drained?                                                                       | Protection compromised     |
| <b>Surface water</b>                                                                                                     |                            |
| Is there human habitation visible upstream or uphill of where people collect water?                                      | Other contamination hazard |
| Are any latrines visible upstream or uphill of where people collect water?                                               | Human faecal hazard        |
| Are there any places where garbage is lying upstream or uphill of where people collect water?                            | Other contamination hazard |
| Are there any cemeteries upstream or uphill of where people collect water?                                               | Other contamination hazard |
| Are there any farm animals kept upstream or uphill of where people fetch water?                                          | Animal faecal hazard       |
| Are there signs of animals (e.g. footprints; faeces; animals present; feathers) within 3m of the water collection point? | Animal faecal hazard       |
| Is there a wall or fencing to keep animals out?                                                                          | Animal faecal hazard       |
| Is there crop production upstream or uphill of where people fetch water?                                                 | Other contamination hazard |
| <b>Protected wells</b>                                                                                                   |                            |
| Is there a latrine within 30m of the well?                                                                               | Human faecal hazard        |
| Is the nearest latrine on higher ground than the well?                                                                   | Human faecal hazard        |
| Is there any animal excreta in the vicinity of the well?                                                                 | Animal faecal hazard       |
| Is there any human excreta in the vicinity of the well?                                                                  | Human faecal hazard        |
| Is there any garbage in the vicinity of the well?                                                                        | Other contamination hazard |
| Are there any cemeteries in the vicinity of the well?                                                                    | Other contamination hazard |
| Are there any animal slaughter areas in the vicinity of the well?                                                        | Other contamination hazard |
| Is there any other contamination source in the vicinity of the well?                                                     | Other contamination hazard |
| Is the drainage poor, causing stagnant water on the cement floor?                                                        | Protection compromised     |
| Is there a drainage channel for this well?                                                                               | Protection compromised     |
| Is the drainage channel broken, permitting ponding?                                                                      | Protection compromised     |

|                                                                          |                            |
|--------------------------------------------------------------------------|----------------------------|
| Is there a wall or fencing to keep animals out?                          | Animal faecal hazard       |
| Are there signs of animals within 3m of the water collection point?      | Animal faecal hazard       |
| Is there a concrete floor around the well?                               | Protection compromised     |
| Is the concrete floor less than 1m wide?                                 | Protection compromised     |
| Is there any ponding on the concrete floor?                              | Protection compromised     |
| Is the concrete cracked?                                                 | Protection compromised     |
| Is the handpump loose at base?                                           | Protection compromised     |
| Was the cover of the well in place and does it fit?                      | Protection compromised     |
| <b>Boreholes</b>                                                         |                            |
| Is there a latrine within 30m of the borehole?                           | Human faecal hazard        |
| Is the nearest latrine on higher ground than the borehole?               | Human faecal hazard        |
| Is there any animal excreta in the vicinity of the borehole?             | Animal faecal hazard       |
| Is there any human excreta in the vicinity of the borehole?              | Human faecal hazard        |
| Is there any garbage in the vicinity of the borehole?                    | Other contamination hazard |
| Is there any cemeteries in the vicinity of the borehole?                 | Other contamination hazard |
| Is there any other contamination source in the vicinity of the borehole? | Other contamination hazard |
| Is the drainage poor, causing stagnant water on the cement floor?        | Other contamination hazard |
| Is there a drainage channel for this well?                               | Protection compromised     |
| Is the drainage channel broken, permitting ponding?                      | Protection compromised     |
| Is there a wall or fencing to keep animals out?                          | Animal faecal hazard       |
| Are there signs of animals within 3m of the water collection point?      | Animal faecal hazard       |
| Is there a concrete floor around the well?                               | Protection compromised     |
| Is the concrete floor less than 1m wide?                                 | Protection compromised     |

|                                             |                           |
|---------------------------------------------|---------------------------|
| Is there any ponding on the concrete floor? | Protection<br>compromised |
| Is the concrete cracked?                    | Protection<br>compromised |
| Is the handpump loose at base?              | Protection<br>compromised |

**Supplemental table S2:** Classification of hazards observed at four rural water source types
